# Supplementary material for: Do QTAIM metrics correlate with the strength of heavy element–ligand bonds?
Source: Royal Society of Chemistry journal article supplement (doi:10.1039/c3dt51337h), 2013-01-01

Do QTAIM metrics correlate with the strength of heavy  
element–ligand bonds?

Abigail R. E. Mountain and Nikolas Kaltsoyannis

*Department of Chemistry, University College London, 20 Gordon Street, London WC1H 0AJ,*

*UK*

Supplementary Information

Cartesian atomic coordinates (Å) and ball-and-stick representations of all molecules studied

$\text{Mo}_2\text{Cl}_6$

```
Mo 0.000000 0.000000 1.115000
Cl 0.000000 2.182589 1.618890
Cl -1.890177 -1.091294 1.618890
Cl 1.890177 -1.091294 1.618890
Mo 0.000000 0.000000 -1.115000
Cl 1.890177 1.091294 -1.618890
Cl 0.000000 -2.182589 -1.618890 Cl -1.890177 1.091294 -1.618890
```

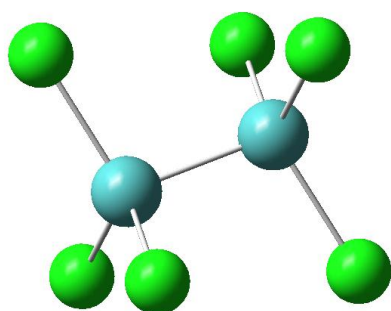

$\text{Mo}_2\text{F}_6$

```
Mo 0.000000 0.000000 1.125000
F 0.000000 1.825827 1.479905
F -1.581212 -0.912913 1.479905
F 1.581212 -0.912913 1.479905
Mo 0.000000 0.000000 -1.125000
F 1.581212 0.912913 -1.479905
F 0.000000 -1.825827 -1.479905
F -1.581212 0.912913 -1.479905
```

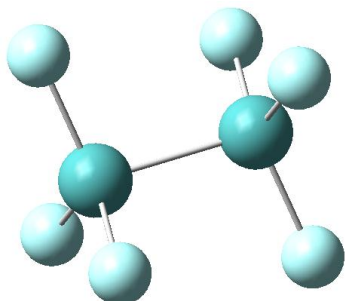

$\text{Mo}_2(\text{OH})_6$

|    |           |           |           |
|----|-----------|-----------|-----------|
| Mo | 0.000000  | 0.000000  | 1.100000  |
| O  | 0.000000  | 1.890831  | 1.433405  |
| O  | -1.637508 | -0.945415 | 1.433405  |
| O  | 1.637508  | -0.945416 | 1.433405  |
| Mo | 0.000000  | 0.000000  | -1.100000 |
| O  | 0.000000  | -1.890831 | -1.433405 |
| O  | -1.637508 | 0.945416  | -1.433405 |
| O  | 1.637508  | 0.945415  | -1.433405 |
| H  | 0.000000  | 2.125802  | 2.377654  |
| H  | -1.840999 | -1.062901 | 2.377654  |
| H  | 1.840999  | -1.062901 | 2.377654  |
| H  | 0.000000  | -2.125802 | -2.377654 |
| H  | -1.840999 | 1.062901  | -2.377654 |
| H  | 1.840999  | 1.062901  | -2.377654 |

$\text{Mo}_2(\text{NH}_2)_6$

|    |           |           |           |
|----|-----------|-----------|-----------|
| Mo | 0.000000  | 0.000000  | 1.100000  |
| N  | 0.000000  | 1.995131  | 1.415998  |
| N  | -1.727834 | -0.997565 | 1.415998  |
| N  | 1.727834  | -0.997565 | 1.415998  |
| Mo | 0.000000  | 0.000000  | -1.100000 |
| N  | 0.000000  | -1.995131 | -1.415998 |
| N  | -1.727834 | 0.997565  | -1.415998 |
| N  | 1.727834  | 0.997565  | -1.415998 |
| H  | 0.000000  | 2.435512  | 2.330542  |
| H  | -2.109215 | -1.217756 | 2.330542  |
| H  | 2.109215  | -1.217756 | 2.330542  |
| H  | 0.000000  | -2.435512 | -2.330542 |
| H  | -2.109215 | 1.217756  | -2.330542 |
| H  | 2.109215  | 1.217756  | -2.330542 |
| H  | 0.000000  | 2.696568  | 0.682299  |
| H  | -2.335296 | -1.348284 | 0.682299  |
| H  | 2.335296  | -1.348284 | 0.682299  |
| H  | 0.000000  | -2.696568 | -0.682299 |
| H  | -2.335296 | 1.348284  | -0.682299 |
| H  | 2.335296  | 1.348284  | -0.682299 |

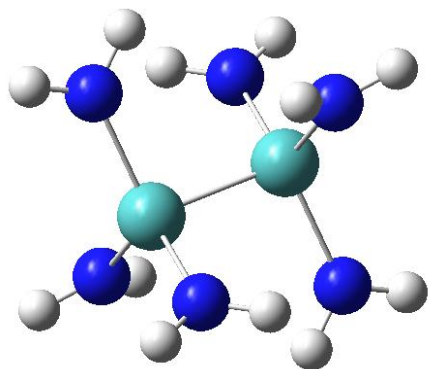

$\text{Mo}_2(\text{CH}_3)_6$

|    |           |           |           |
|----|-----------|-----------|-----------|
| Mo | 0.000000  | 0.000000  | 1.105000  |
| C  | 0.000000  | 2.054110  | 1.541615  |
| C  | -1.778911 | -1.027055 | 1.541615  |
| C  | 1.778911  | -1.027055 | 1.541615  |
| Mo | 0.000000  | 0.000000  | -1.105000 |
| C  | 0.000000  | -2.054110 | -1.541615 |
| C  | -1.778911 | 1.027055  | -1.541615 |
| C  | 1.778911  | 1.027055  | -1.541615 |
| H  | 0.000000  | 2.222432  | 2.627932  |
| H  | -1.924683 | -1.111216 | 2.627932  |
| H  | 1.924683  | -1.111216 | 2.627932  |
| H  | 0.000000  | -2.222432 | -2.627932 |
| H  | -1.924683 | 1.111216  | -2.627932 |
| H  | 1.924683  | 1.111216  | -2.627932 |
| H  | 0.889913  | 2.542902  | 1.120240  |
| H  | -0.889913 | 2.542902  | 1.120240  |
| H  | -2.647174 | -0.500764 | 1.120240  |
| H  | -1.757261 | -2.042138 | 1.120240  |
| H  | 1.757261  | -2.042138 | 1.120240  |
| H  | 2.647174  | -0.500764 | 1.120240  |
| H  | 0.889913  | -2.542902 | -1.120240 |
| H  | -0.889913 | -2.542902 | -1.120240 |
| H  | -2.647174 | 0.500764  | -1.120240 |
| H  | -1.757261 | 2.042138  | -1.120240 |
| H  | 1.757261  | 2.042138  | -1.120240 |
| H  | 2.647174  | 0.500764  | -1.120240 |

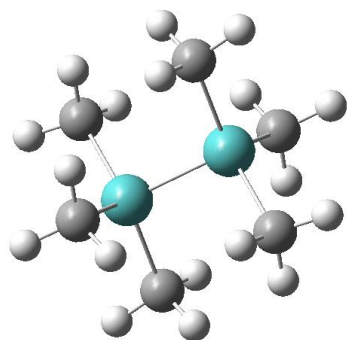

$W_2Cl_6$

|    |           |           |           |
|----|-----------|-----------|-----------|
| W  | 0.000000  | 0.000000  | 1.150000  |
| Cl | 0.000000  | 2.192333  | 1.656140  |
| Cl | -1.898616 | -1.096166 | 1.656140  |
| Cl | 1.898616  | -1.096166 | 1.656140  |
| W  | 0.000000  | 0.000000  | -1.150000 |
| Cl | 1.898616  | 1.096166  | -1.656140 |
| Cl | 0.000000  | -2.192333 | -1.656140 |
| Cl | -1.898616 | 1.096166  | -1.656140 |

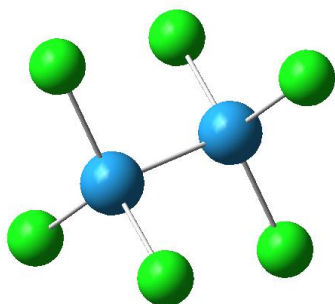

$W_2F_6$

|   |           |           |           |
|---|-----------|-----------|-----------|
| W | 0.000000  | 0.000000  | 1.155000  |
| F | 0.000000  | 1.838917  | 1.545874  |
| F | -1.592549 | -0.919459 | 1.545874  |
| F | 1.592549  | -0.919459 | 1.545874  |
| W | 0.000000  | 0.000000  | -1.155000 |
| F | 1.592549  | 0.919459  | -1.545874 |
| F | 0.000000  | -1.838917 | -1.545874 |
| F | -1.592549 | 0.919459  | -1.545874 |

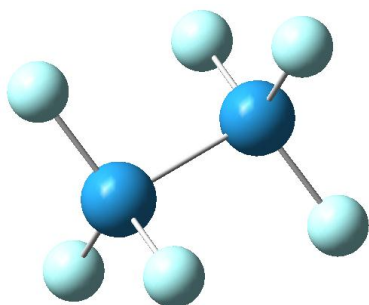

$W_2(OH)_6$

|   |           |           |           |
|---|-----------|-----------|-----------|
| W | 0.000000  | 0.000000  | 1.150000  |
| O | 0.000000  | 1.900679  | 1.485141  |
| O | -1.646036 | -0.950339 | 1.485141  |
| O | 1.646036  | -0.950340 | 1.485141  |
| W | 0.000000  | 0.000000  | -1.150000 |
| O | 0.000000  | -1.900679 | -1.485141 |
| O | -1.646036 | 0.950340  | -1.485141 |
| O | 1.646036  | 0.950339  | -1.485141 |
| H | 0.000000  | 2.143361  | 2.427966  |
| H | -1.856205 | -1.071681 | 2.427966  |
| H | 1.856205  | -1.071681 | 2.427966  |
| H | 0.000000  | -2.143361 | -2.427966 |
| H | -1.856205 | 1.071681  | -2.427966 |
| H | 1.856205  | 1.071680  | -2.427966 |

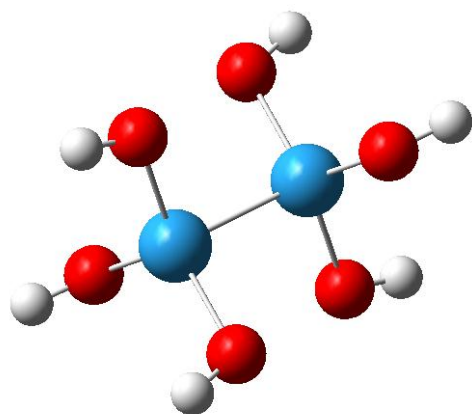

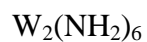

|   |           |           |           |
|---|-----------|-----------|-----------|
| W | 0.000000  | 0.000000  | 1.145000  |
| N | 0.000000  | 1.995130  | 1.460998  |
| N | -1.727833 | -0.997565 | 1.460998  |
| N | 1.727833  | -0.997565 | 1.460998  |
| W | 0.000000  | 0.000000  | -1.145000 |
| N | 0.000000  | -1.995130 | -1.460998 |
| N | -1.727833 | 0.997565  | -1.460998 |
| N | 1.727833  | 0.997565  | -1.460998 |
| H | 0.000000  | 2.436927  | 2.374807  |
| H | -2.110441 | -1.218463 | 2.374807  |
| H | 2.110441  | -1.218463 | 2.374807  |
| H | 0.000000  | -2.436927 | -2.374807 |
| H | -2.110441 | 1.218463  | -2.374807 |
| H | 2.110441  | 1.218463  | -2.374807 |
| H | 0.000000  | 2.697686  | 0.728436  |
| H | -2.336265 | -1.348843 | 0.728436  |
| H | 2.336265  | -1.348843 | 0.728436  |
| H | 0.000000  | -2.697686 | -0.728436 |
| H | -2.336265 | 1.348843  | -0.728436 |
| H | 2.336265  | 1.348843  | -0.728436 |

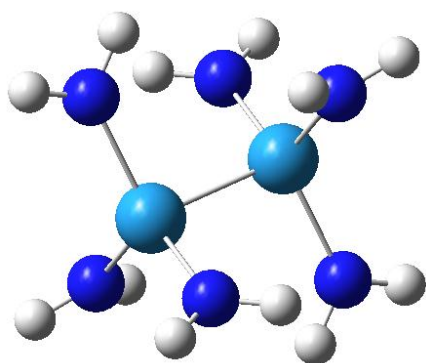



$W_2(CH_3)_6$

|   |           |           |           |
|---|-----------|-----------|-----------|
| W | 0.000000  | 0.000000  | 1.145000  |
| C | 0.000000  | 2.046177  | 1.617397  |
| C | -1.772041 | -1.023088 | 1.617397  |
| C | 1.772041  | -1.023089 | 1.617397  |
| W | 0.000000  | 0.000000  | -1.145000 |
| C | 0.000000  | -2.046177 | -1.617397 |
| C | -1.772041 | 1.023089  | -1.617397 |
| C | 1.772041  | 1.023088  | -1.617397 |
| H | 0.000000  | 2.206899  | 2.706262  |
| H | -1.911231 | -1.103449 | 2.706262  |
| H | 1.911231  | -1.103450 | 2.706262  |
| H | 0.000000  | -2.206899 | -2.706262 |
| H | -1.911231 | 1.103450  | -2.706262 |
| H | 1.911231  | 1.103449  | -2.706262 |
| H | 0.887506  | 2.552695  | 1.208456  |
| H | -0.887506 | 2.552695  | 1.208456  |
| H | -2.654452 | -0.507745 | 1.208456  |
| H | -1.766946 | -2.044950 | 1.208456  |
| H | 1.766946  | -2.044950 | 1.208456  |
| H | 2.654452  | -0.507745 | 1.208456  |
| H | 0.887506  | -2.552695 | -1.208456 |
| H | -0.887506 | -2.552695 | -1.208456 |
| H | -2.654452 | 0.507745  | -1.208456 |
| H | -1.766946 | 2.044950  | -1.208456 |
| H | 1.766946  | 2.044950  | -1.208456 |
| H | 2.654452  | 0.507745  | -1.208456 |

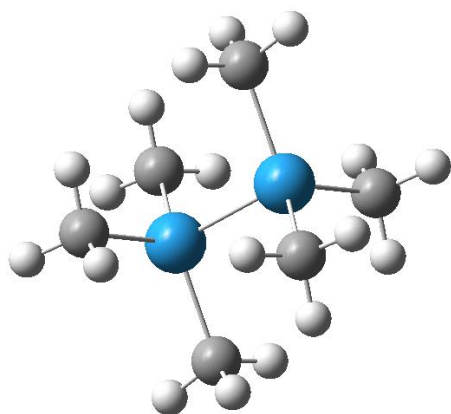

$U_2Cl_6$

```
U 0.000000 0.000000 1.175000
Cl 0.000000 2.151564 2.367632
Cl -1.863309 -1.075782 2.367632
Cl 1.863309 -1.075782 2.367632
U 0.000000 0.000000 -1.175000
Cl 1.863309 1.075782 -2.367632
Cl 0.000000 -2.151564 -2.367632
Cl -1.863309 1.075782 -2.367632
```

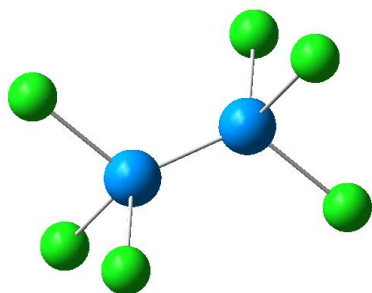

$U_2F_6$

```
U 0.000000 0.000000 1.190000
F 0.000000 1.710888 2.301064
F -1.481672 -0.855444 2.301064
F 1.481672 -0.855444 2.301064
U 0.000000 0.000000 -1.190000
F 1.481672 0.855444 -2.301064
F 0.000000 -1.710888 -2.301064
F -1.481672 0.855444 -2.301064
```

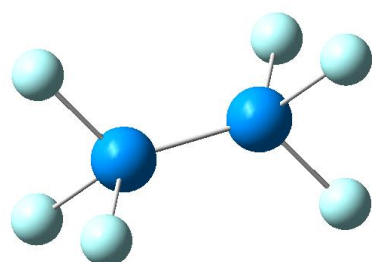

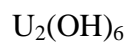

|   |           |           |           |
|---|-----------|-----------|-----------|
| U | 0.000000  | 0.000000  | 1.185000  |
| O | 0.000000  | 1.763940  | 2.287232  |
| O | -1.527617 | -0.881970 | 2.287232  |
| O | 1.527617  | -0.881970 | 2.287232  |
| U | 0.000000  | 0.000000  | -1.185000 |
| O | 0.000000  | -1.763940 | -2.287232 |
| O | -1.527617 | 0.881970  | -2.287232 |
| O | 1.527617  | 0.881970  | -2.287232 |
| H | 0.000000  | 2.267335  | 3.110671  |
| H | -1.963570 | -1.133668 | 3.110671  |
| H | 1.963570  | -1.133668 | 3.110671  |
| H | 0.000000  | -2.267335 | -3.110671 |
| H | -1.963570 | 1.133668  | -3.110671 |
| H | 1.963570  | 1.133667  | -3.110671 |

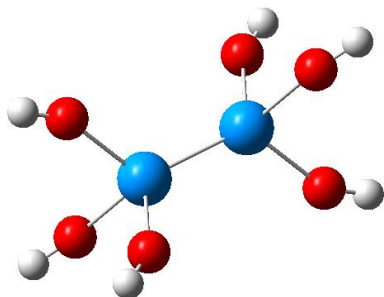

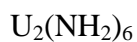

|   |           |           |           |
|---|-----------|-----------|-----------|
| U | 0.000000  | 0.000000  | 1.175000  |
| N | 0.000000  | 1.959371  | 2.130649  |
| N | -1.696865 | -0.979685 | 2.130649  |
| N | 1.696865  | -0.979686 | 2.130649  |
| U | 0.000000  | 0.000000  | -1.175000 |
| N | 0.000000  | -1.959371 | -2.130649 |
| N | -1.696865 | 0.979686  | -2.130649 |
| N | 1.696865  | 0.979685  | -2.130649 |
| H | 0.000000  | 2.149183  | 3.133612  |
| H | -1.861247 | -1.074591 | 3.133612  |
| H | 1.861247  | -1.074592 | 3.133612  |
| H | 0.000000  | -2.149183 | -3.133612 |
| H | -1.861247 | 1.074592  | -3.133612 |
| H | 1.861247  | 1.074591  | -3.133612 |
| H | 0.000000  | 2.866577  | 1.662737  |
| H | -2.482529 | -1.433289 | 1.662737  |
| H | 2.482529  | -1.433289 | 1.662737  |
| H | 0.000000  | -2.866577 | -1.662737 |
| H | -2.482529 | 1.433289  | -1.662737 |
| H | 2.482529  | 1.433288  | -1.662737 |

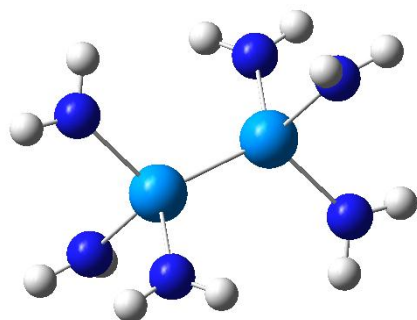

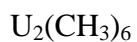

|   |           |           |           |
|---|-----------|-----------|-----------|
| U | -0.301633 | 1.140797  | 0.000000  |
| C | -2.511613 | 1.909944  | 0.000000  |
| C | 0.301633  | 2.653781  | 1.680044  |
| C | 0.301633  | 2.653781  | -1.680044 |
| U | 0.301633  | -1.140797 | 0.000000  |
| C | 2.511613  | -1.909944 | 0.000000  |
| C | -0.301633 | -2.653781 | 1.680044  |
| C | -0.301633 | -2.653781 | -1.680044 |
| H | -2.551669 | 3.010346  | 0.000000  |
| H | -0.090177 | 3.661178  | 1.469980  |
| H | -0.090177 | 3.661178  | -1.469980 |
| H | 2.551669  | -3.010346 | 0.000000  |
| H | 0.090177  | -3.661178 | 1.469980  |
| H | 0.090177  | -3.661178 | -1.469980 |
| H | -3.057577 | 1.556727  | -0.888623 |
| H | -3.057577 | 1.556727  | 0.888623  |
| H | -0.091965 | 2.340851  | 2.659658  |
| H | 1.396040  | 2.734287  | 1.771036  |
| H | 1.396040  | 2.734287  | -1.771036 |
| H | -0.091965 | 2.340851  | -2.659658 |
| H | 3.057577  | -1.556727 | -0.888623 |
| H | 3.057577  | -1.556727 | 0.888623  |
| H | 0.091965  | -2.340851 | 2.659658  |
| H | -1.396040 | -2.734287 | 1.771036  |
| H | -1.396040 | -2.734287 | -1.771036 |
| H | 0.091965  | -2.340851 | -2.659658 |

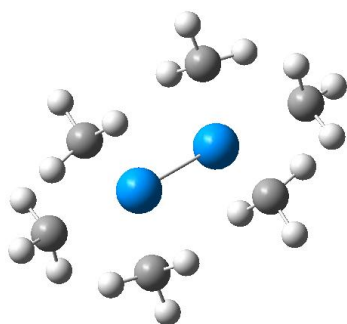

(CO)<sub>5</sub>Cr-nNHC

|    |           |           |           |
|----|-----------|-----------|-----------|
| C  | 0.000000  | 0.000000  | -1.421798 |
| N  | 0.000000  | 1.060438  | -2.280638 |
| N  | 0.000000  | -1.060438 | -2.280638 |
| C  | 0.000000  | 0.679233  | -3.614995 |
| C  | 0.000000  | -0.679233 | -3.614995 |
| H  | 0.000000  | 2.017876  | -1.952182 |
| H  | 0.000000  | -2.017876 | -1.952182 |
| H  | 0.000000  | 1.389186  | -4.430296 |
| H  | 0.000000  | -1.389186 | -4.430296 |
| Cr | 0.000000  | 0.000000  | 0.667699  |
| C  | -1.895480 | 0.000000  | 0.623420  |
| C  | 0.000000  | 0.000000  | 2.540765  |
| C  | 1.895480  | 0.000000  | 0.623420  |
| C  | 0.000000  | -1.884431 | 0.671854  |
| C  | 0.000000  | 1.884431  | 0.671854  |
| O  | 0.000000  | -3.046607 | 0.664142  |
| O  | 3.052704  | 0.000000  | 0.597229  |
| O  | -3.052704 | 0.000000  | 0.597229  |
| O  | 0.000000  | 3.046607  | 0.664142  |
| O  | 0.000000  | 0.000000  | 3.701258  |

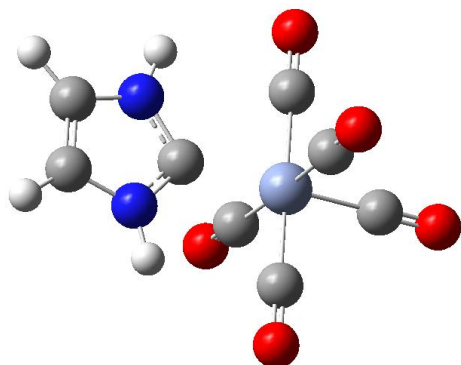

(CO)<sub>5</sub>Cr-aNHC

|    |           |           |           |
|----|-----------|-----------|-----------|
| C  | -0.091901 | 1.407064  | 0.000000  |
| C  | -1.141227 | 2.312155  | 0.000000  |
| N  | 1.026106  | 2.256056  | 0.000000  |
| N  | -0.635182 | 3.605624  | 0.000000  |
| C  | 0.702377  | 3.559089  | 0.000000  |
| H  | -2.208567 | 2.139751  | 0.000000  |
| H  | 1.980493  | 1.910824  | 0.000000  |
| H  | -1.176719 | 4.462160  | 0.000000  |
| H  | 1.375187  | 4.404959  | 0.000000  |
| Cr | -0.002481 | -0.699148 | 0.000000  |
| C  | 1.872592  | -0.626554 | 0.000000  |
| C  | 0.049412  | -2.566950 | 0.000000  |
| C  | -1.891551 | -0.740068 | 0.000000  |
| C  | -0.006502 | -0.634089 | 1.892013  |
| C  | -0.006502 | -0.634089 | -1.892013 |
| O  | -0.006502 | -0.584533 | 3.049903  |
| O  | -3.051786 | -0.762600 | 0.000000  |
| O  | 3.035333  | -0.543329 | 0.000000  |
| O  | -0.006502 | -0.584533 | -3.049903 |
| O  | 0.083517  | -3.728662 | 0.000000  |

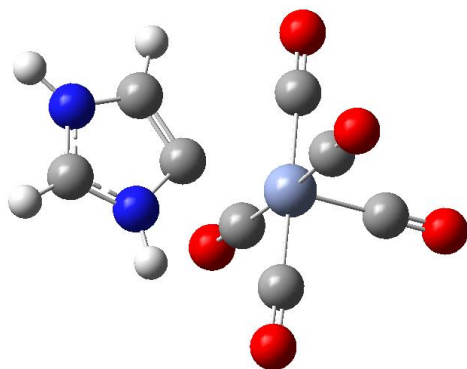

(CO)<sub>5</sub>Cr-IMID

|    |           |           |           |
|----|-----------|-----------|-----------|
| N  | 0.829524  | 1.272296  | 0.000000  |
| C  | 0.373869  | 2.578862  | 0.000000  |
| C  | 2.155324  | 1.341743  | 0.000000  |
| C  | 1.439651  | 3.439848  | 0.000000  |
| N  | 2.561134  | 2.637691  | 0.000000  |
| H  | -0.682073 | 2.811993  | 0.000000  |
| H  | 2.835759  | 0.501152  | 0.000000  |
| H  | 1.497686  | 4.519662  | 0.000000  |
| H  | 3.523022  | 2.952608  | 0.000000  |
| Cr | -0.356749 | -0.534637 | 0.000000  |
| C  | 1.174911  | -1.641887 | 0.000000  |
| C  | -1.376834 | -2.077135 | 0.000000  |
| C  | -1.980368 | 0.439892  | 0.000000  |
| C  | -0.339703 | -0.508698 | 1.899675  |
| C  | -0.339703 | -0.508698 | -1.899675 |
| O  | -0.339703 | -0.513234 | 3.056509  |
| O  | -3.006082 | 0.979930  | 0.000000  |
| O  | 2.079502  | -2.369093 | 0.000000  |
| O  | -0.339703 | -0.513234 | -3.056509 |
| O  | -2.017756 | -3.047818 | 0.000000  |

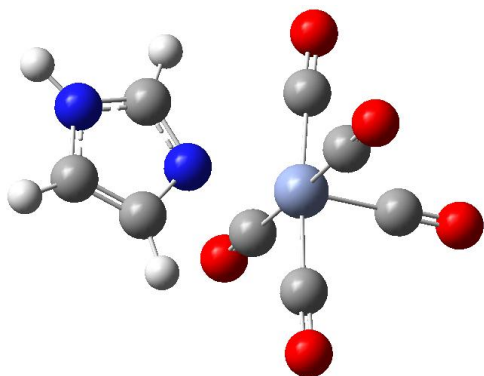



(CO)<sub>5</sub>Mo-nNHC

|    |           |           |           |
|----|-----------|-----------|-----------|
| C  | 0.000000  | 0.000000  | -1.637867 |
| N  | 0.000000  | 1.059909  | -2.498005 |
| N  | 0.000000  | -1.059909 | -2.498005 |
| C  | 0.000000  | 0.679453  | -3.832044 |
| C  | 0.000000  | -0.679453 | -3.832044 |
| H  | 0.000000  | 2.017069  | -2.168942 |
| H  | 0.000000  | -2.017069 | -2.168942 |
| H  | 0.000000  | 1.388812  | -4.648030 |
| H  | 0.000000  | -1.388812 | -4.648030 |
| Mo | 0.000000  | 0.000000  | 0.600100  |
| C  | 0.000000  | -2.043289 | 0.610204  |
| C  | 0.000000  | 0.000000  | 2.625233  |
| C  | 0.000000  | 2.043289  | 0.610204  |
| C  | 2.053762  | 0.000000  | 0.578699  |
| C  | -2.053762 | 0.000000  | 0.578699  |
| O  | 3.210515  | 0.000000  | 0.569237  |
| O  | 0.000000  | 3.204215  | 0.612870  |
| O  | 0.000000  | -3.204215 | 0.612870  |
| O  | -3.210515 | 0.000000  | 0.569237  |
| O  | 0.000000  | 0.000000  | 3.785195  |

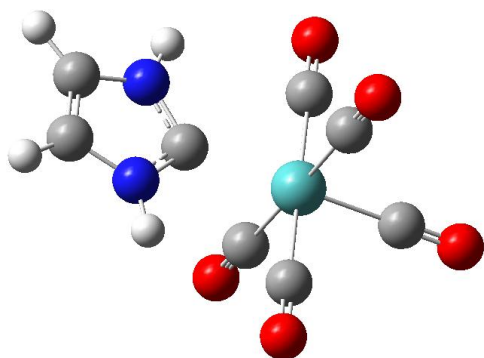

(CO)<sub>5</sub>Mo-aNHC

|    |           |           |           |
|----|-----------|-----------|-----------|
| C  | -0.063146 | 1.625338  | 0.000000  |
| C  | -1.090695 | 2.555072  | 0.000000  |
| N  | 1.073560  | 2.450802  | 0.000000  |
| N  | -0.556507 | 3.837619  | 0.000000  |
| C  | 0.779956  | 3.760727  | 0.000000  |
| H  | -2.161970 | 2.407403  | 0.000000  |
| H  | 2.019289  | 2.083852  | 0.000000  |
| H  | -1.078223 | 4.706491  | 0.000000  |
| H  | 1.471024  | 4.591913  | 0.000000  |
| Mo | -0.015967 | -0.625906 | 0.000000  |
| C  | 2.020377  | -0.602820 | 0.000000  |
| C  | 0.001548  | -2.647179 | 0.000000  |
| C  | -2.064383 | -0.631094 | 0.000000  |
| C  | -0.017561 | -0.584231 | 2.050963  |
| C  | -0.017561 | -0.584231 | -2.050963 |
| O  | -0.017561 | -0.552069 | 3.208561  |
| O  | -3.223831 | -0.627563 | 0.000000  |
| O  | 3.183830  | -0.568292 | 0.000000  |
| O  | -0.017561 | -0.552069 | -3.208561 |
| O  | 0.013864  | -3.808766 | 0.000000  |

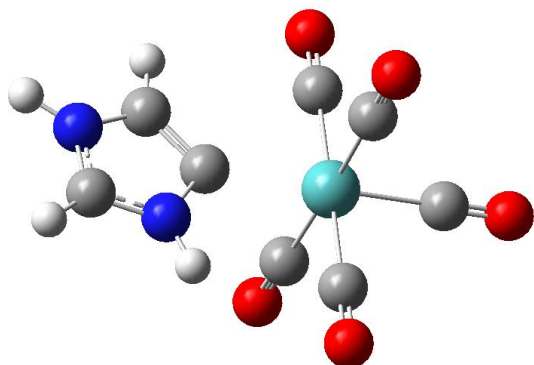

(CO)<sub>5</sub>Mo-IMID

|    |           |           |           |
|----|-----------|-----------|-----------|
| N  | 0.066385  | 1.724722  | 0.000000  |
| C  | -0.996803 | 2.611692  | 0.000000  |
| C  | 1.167524  | 2.467662  | 0.000000  |
| C  | -0.526094 | 3.898477  | 0.000000  |
| N  | 0.848850  | 3.787364  | 0.000000  |
| H  | -2.021854 | 2.266592  | 0.000000  |
| H  | 2.183241  | 2.095573  | 0.000000  |
| H  | -1.031151 | 4.854880  | 0.000000  |
| H  | 1.511286  | 4.552837  | 0.000000  |
| Mo | -0.027531 | -0.572343 | 0.000000  |
| C  | 2.010054  | -0.740574 | 0.000000  |
| C  | -0.114515 | -2.557656 | 0.000000  |
| C  | -2.076190 | -0.564773 | 0.000000  |
| C  | -0.027466 | -0.585452 | 2.053444  |
| C  | -0.027466 | -0.585452 | -2.053444 |
| O  | -0.027466 | -0.630842 | 3.209316  |
| O  | -3.233287 | -0.622148 | 0.000000  |
| O  | 3.159780  | -0.894050 | 0.000000  |
| O  | -0.027466 | -0.630842 | -3.209316 |
| O  | -0.164828 | -3.719568 | 0.000000  |

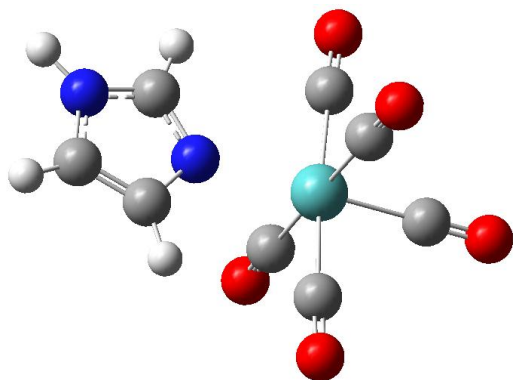

(CO)<sub>5</sub>W-nNHC

|   |           |           |           |
|---|-----------|-----------|-----------|
| C | 0.000000  | 0.000000  | -1.736446 |
| N | 0.000000  | 1.060310  | -2.596219 |
| N | 0.000000  | -1.060310 | -2.596219 |
| C | 0.000000  | 0.679649  | -3.929281 |
| C | 0.000000  | -0.679649 | -3.929281 |
| H | 0.000000  | 2.017234  | -2.266162 |
| H | 0.000000  | -2.017234 | -2.266162 |
| H | 0.000000  | 1.389060  | -4.745046 |
| H | 0.000000  | -1.389060 | -4.745046 |
| W | 0.000000  | 0.000000  | 0.491259  |
| C | -2.052260 | 0.000000  | 0.484766  |
| C | 0.000000  | 0.000000  | 2.519742  |
| C | 2.052260  | 0.000000  | 0.484766  |
| C | 0.000000  | -2.041675 | 0.485420  |
| C | 0.000000  | 2.041675  | 0.485420  |
| O | 0.000000  | -3.203897 | 0.468557  |
| O | 3.210171  | 0.000000  | 0.492872  |
| O | -3.210171 | 0.000000  | 0.492872  |
| O | 0.000000  | 3.203897  | 0.468557  |
| O | 0.000000  | 0.000000  | 3.680362  |

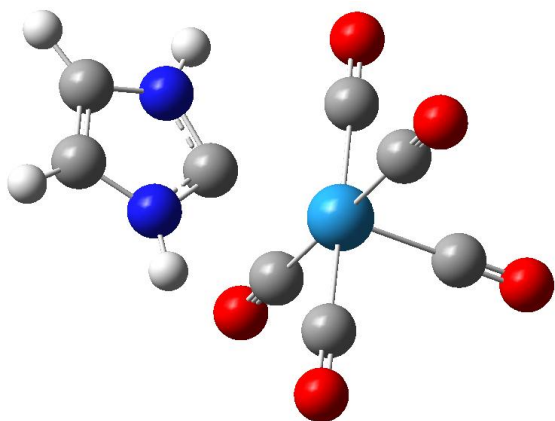

(CO)<sub>5</sub>W-aNHC

|   |           |           |           |
|---|-----------|-----------|-----------|
| C | 1.144464  | 1.307398  | 0.000000  |
| C | 2.528496  | 1.378121  | 0.000000  |
| N | 0.784453  | 2.664849  | 0.000000  |
| N | 2.923804  | 2.708876  | 0.000000  |
| C | 1.839558  | 3.494025  | 0.000000  |
| H | 3.264556  | 0.586078  | 0.000000  |
| H | -0.181056 | 2.976721  | 0.000000  |
| H | 3.877296  | 3.051927  | 0.000000  |
| H | 1.828636  | 4.574674  | 0.000000  |
| W | -0.310469 | -0.402577 | 0.000000  |
| C | -0.300274 | -0.393354 | 2.050529  |
| C | -1.607231 | -1.954568 | 0.000000  |
| C | -0.300274 | -0.393354 | -2.050529 |
| C | -1.861877 | 0.915325  | 0.000000  |
| C | 1.274686  | -1.697882 | 0.000000  |
| O | -2.731577 | 1.691170  | 0.000000  |
| O | -0.300274 | -0.394122 | -3.209713 |
| O | -0.300274 | -0.394122 | 3.209713  |
| O | 2.177709  | -2.427117 | 0.000000  |
| O | -2.355311 | -2.844444 | 0.000000  |

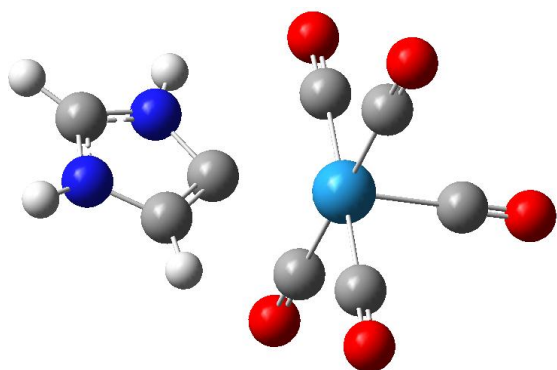

(CO)<sub>5</sub>W-IMID

|    |           |           |           |
|----|-----------|-----------|-----------|
| N  | 0.829524  | 1.272296  | 0.000000  |
| C  | 0.373869  | 2.578862  | 0.000000  |
| C  | 2.155324  | 1.341743  | 0.000000  |
| C  | 1.439651  | 3.439848  | 0.000000  |
| N  | 2.561134  | 2.637691  | 0.000000  |
| H  | -0.682073 | 2.811993  | 0.000000  |
| H  | 2.835759  | 0.501152  | 0.000000  |
| H  | 1.497686  | 4.519662  | 0.000000  |
| H  | 3.523022  | 2.952608  | 0.000000  |
| Cr | -0.356749 | -0.534637 | 0.000000  |
| C  | 1.174911  | -1.641887 | 0.000000  |
| C  | -1.376834 | -2.077135 | 0.000000  |
| C  | -1.980368 | 0.439892  | 0.000000  |
| C  | -0.339703 | -0.508698 | 1.899675  |
| C  | -0.339703 | -0.508698 | -1.899675 |
| O  | -0.339703 | -0.513234 | 3.056509  |
| O  | -3.006082 | 0.979930  | 0.000000  |
| O  | 2.079502  | -2.369093 | 0.000000  |
| O  | -0.339703 | -0.513234 | -3.056509 |
| O  | -2.017756 | -3.047818 | 0.000000  |

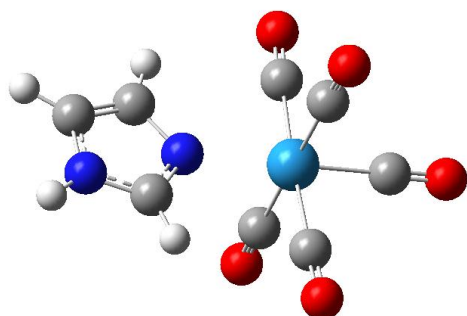

## Uranyl 1

U -0.017403 0.067787 0.001277  
O -0.306730 -0.057236 -1.784929  
Cl 0.144289 2.722482 -0.267795  
O 0.214824 0.246872 1.787870  
Cl -0.024278 -2.590777 0.299564  
N -2.399373 0.022370 0.523002  
P -3.895280 0.077422 -0.092945  
H -2.404210 -0.260110 1.509554  
C -4.160588 1.656520 -1.039978  
C -3.547163 1.641687 -2.451581  
C -3.639516 2.895026 -0.261218  
C -4.046656 2.854459 -3.260507  
C -3.248923 4.046704 -1.201919  
C -4.203761 4.114246 -2.388415  
H -5.263492 1.713525 -1.150256  
H -2.450128 1.666745 -2.358079  
H -3.798625 0.724015 -3.000669  
H -4.421578 3.244858 0.428512  
H -2.759861 2.612589 0.337948  
H -3.325200 3.045291 -4.072091  
H -5.008905 2.608724 -3.741799  
H -3.251770 4.989297 -0.632169  
H -2.215481 3.898915 -1.554850  
H -5.239953 4.186440 -2.010149  
H -4.029234 5.019815 -2.991652  
C -4.342607 -1.283413 -1.305333  
C -5.099419 -2.488931 -0.732805  
C -3.096946 -1.801692 -2.059584  
C -5.746559 -3.312969 -1.912424  
C -3.381738 -3.127337 -2.793242  
C -4.882054 -3.251412 -3.187466  
H -5.026154 -0.769736 -2.011448  
H -4.389214 -3.131098 -0.186924  
H -5.899195 -2.208844 -0.033192  
H -2.735738 -1.043731 -2.768026  
H -2.277874 -1.961172 -1.342333  
H -5.863936 -4.359703 -1.578977  
H -6.759271 -2.921027 -2.118533  
H -2.739962 -3.201120 -3.683777  
H -3.121467 -3.980727 -2.145379  
H -5.164274 -2.376151 -3.802130  
H -5.052337 -4.145080 -3.813325  
C -5.159579 -0.013476 1.269421  
C -5.371762 1.311747 2.028672  
C -4.795778 -1.108960 2.283529  
C -6.076251 1.073094 3.421894  
C -6.041868 -1.448893 3.186162  
C -6.941793 -0.217093 3.389601

H -6.103794 -0.291205 0.764702  
H -4.405910 1.807721 2.208047  
H -5.988569 1.993640 1.422537  
H -4.419841 -2.026831 1.812768  
H -3.984118 -0.727645 2.925541  
H -5.312722 0.968475 4.213251  
H -6.689851 1.953679 3.676751  
H -6.618526 -2.269981 2.723505  
H -5.673254 -1.820894 4.158903  
H -7.674459 -0.133792 2.565289  
H -7.526975 -0.316492 4.320662  
N 2.374886 -0.102877 -0.500294  
P 3.882299 -0.136704 0.092502  
H 2.382830 0.086836 -1.511625  
C 3.987548 -1.172338 1.615875  
C 3.957354 -2.694786 1.319727  
C 2.913365 -0.878790 2.682719  
C 3.623791 -3.505863 2.593724  
C 3.377407 -1.456949 4.032078  
C 4.126936 -2.794038 3.849403  
H 4.983489 -0.904422 2.029839  
H 3.188508 -2.906412 0.558068  
H 4.937690 -3.014660 0.923368  
H 2.671590 0.186208 2.783611  
H 1.980855 -1.363587 2.361396  
H 2.529485 -3.639015 2.664638  
H 4.059616 -4.516646 2.506855  
H 4.027553 -0.730987 4.555596  
H 2.487361 -1.604266 4.670115  
H 5.214789 -2.613812 3.751158  
H 3.999755 -3.431666 4.742225  
C 5.100826 -0.886482 -1.123387  
C 5.704262 0.109623 -2.129917  
C 4.480902 -2.091957 -1.889057  
C 6.883576 -0.539927 -2.885659  
C 5.138091 -2.308167 -3.264713  
C 6.637657 -2.032974 -3.184666  
H 5.930566 -1.244912 -0.477713  
H 4.922061 0.420192 -2.846555  
H 6.065589 1.025298 -1.637987  
H 4.609213 -3.004859 -1.286532  
H 3.392794 -1.950582 -2.008449  
H 7.041967 0.015420 -3.827940  
H 7.808402 -0.423553 -2.291464  
H 4.938642 -3.340791 -3.600326  
H 4.683938 -1.641133 -4.020851  
H 7.068770 -2.658112 -2.379698  
H 7.151258 -2.326857 -4.116817  
C 4.595292 1.543011 0.517961  
C 4.373331 2.042759 1.959145



|   |          |          |           |
|---|----------|----------|-----------|
| C | 4.058442 | 2.608004 | -0.477152 |
| C | 5.269835 | 3.273466 | 2.224140  |
| C | 4.195812 | 4.038931 | 0.084142  |
| C | 5.431893 | 4.159491 | 0.972677  |
| H | 5.690356 | 1.414872 | 0.384891  |
| H | 3.309884 | 2.312121 | 2.080967  |
| H | 4.602925 | 1.268185 | 2.707599  |
| H | 4.600674 | 2.532608 | -1.434717 |
| H | 2.991536 | 2.411047 | -0.681600 |
| H | 4.821409 | 3.860239 | 3.046435  |
| H | 6.262688 | 2.939394 | 2.577773  |
| H | 4.234257 | 4.756858 | -0.753521 |
| H | 3.294389 | 4.293210 | 0.670424  |
| H | 6.321866 | 3.843439 | 0.395417  |
| H | 5.611274 | 5.208321 | 1.268773  |

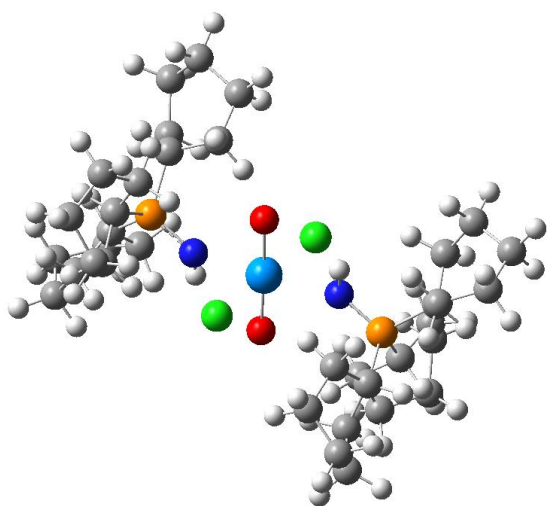

## Uranyl 2

U -0.009177 0.057664 -0.009059  
O -0.273496 -0.024392 -1.792411  
Cl 0.081109 2.713034 -0.163037  
O 0.224592 0.188068 1.774067  
Cl 0.038274 -2.596717 0.152694  
O -2.382040 0.012096 0.349893  
P -3.845621 0.105956 -0.106819  
C -4.191540 1.747062 -0.884168  
C -3.603347 1.855094 -2.301594  
C -3.655189 2.913762 -0.005577  
C -4.115902 3.130857 -2.997968  
C -3.268450 4.139525 -0.842755  
C -4.266184 4.314061 -2.019784  
H -5.297015 1.803619 -0.957801  
H -2.505157 1.876074 -2.221443  
H -3.860713 0.984065 -2.920923  
H -4.429901 3.203496 0.718885  
H -2.769671 2.584529 0.560494  
H -3.403937 3.393801 -3.800189  
H -5.085385 2.923724 -3.487145  
H -3.258900 5.031270 -0.197567  
H -2.247151 4.018822 -1.236101  
H -5.293635 4.344689 -1.609137  
H -4.103715 5.272726 -2.542248  
C -4.315101 -1.194696 -1.354479  
C -5.045236 -2.475207 -0.807652  
C -3.100445 -1.658831 -2.188543  
C -5.731908 -3.220194 -2.010031  
C -3.404694 -2.951434 -2.976228  
C -4.885092 -3.068972 -3.328833  
H -5.043341 -0.670495 -2.004949  
H -4.293234 -3.133418 -0.339628  
H -5.809124 -2.245526 -0.049143  
H -2.783841 -0.860197 -2.874236  
H -2.245744 -1.843894 -1.522329  
H -5.834255 -4.288816 -1.750686  
H -6.747754 -2.816405 -2.167876  
H -2.779459 -2.975804 -3.882007  
H -3.111876 -3.829252 -2.375597  
H -5.209008 -2.165644 -3.879073  
H -5.074160 -3.929803 -3.993869  
C -4.983110 -0.131577 1.331392  
C -5.235438 1.148366 2.219356  
C -4.490591 -1.260314 2.247819  
C -5.846485 0.752233 3.620234  
C -5.659388 -1.736937 3.184554  
C -6.629858 -0.591080 3.520465  
H -5.951225 -0.420650 0.876749

H -4.287391 1.683618 2.386444  
H -5.927373 1.828904 1.694244  
H -4.087938 -2.118894 1.692616  
H -3.653246 -0.867698 2.846814  
H -5.035073 0.633265 4.359952  
H -6.499438 1.566371 3.977779  
H -6.209547 -2.563147 2.698447  
H -5.218957 -2.146347 4.111326  
H -7.403042 -0.492501 2.735438  
H -7.165579 -0.799781 4.463471  
O 2.366593 -0.031928 -0.350382  
P 3.829123 -0.126119 0.108930  
C 4.051671 -1.295932 1.517992  
C 4.025364 -2.785799 1.086886  
C 3.000557 -1.110733 2.632098  
C 3.752765 -3.713492 2.295589  
C 3.501406 -1.803195 3.913080  
C 4.277854 -3.098102 3.592039  
H 5.057510 -1.049479 1.921341  
H 3.224477 -2.942010 0.345518  
H 4.988774 -3.055641 0.617702  
H 2.752992 -0.060407 2.832977  
H 2.063439 -1.573129 2.286890  
H 2.664655 -3.880173 2.388230  
H 4.208735 -4.701466 2.108616  
H 4.145943 -1.114849 4.491121  
H 2.628138 -2.032380 4.550137  
H 5.356471 -2.878788 3.475918  
H 4.196746 -3.812929 4.429830  
C 4.928643 -0.750852 -1.259591  
C 5.524955 0.316151 -2.195310  
C 4.196246 -1.827487 -2.111852  
C 6.645577 -0.307634 -3.055350  
C 4.825659 -1.975895 -3.511850  
C 6.336930 -1.767549 -3.442749  
H 5.775322 -1.222572 -0.716424  
H 4.720928 0.711693 -2.841075  
H 5.941208 1.171293 -1.640696  
H 4.247162 -2.797331 -1.593380  
H 3.128589 -1.565456 -2.203074  
H 6.771650 0.306942 -3.965322  
H 7.603515 -0.259603 -2.505531  
H 4.577948 -2.972998 -3.915812  
H 4.389165 -1.237997 -4.209726  
H 6.757672 -2.458687 -2.687715  
H 6.823787 -2.020510 -4.401089  
C 4.502238 1.526584 0.602944  
C 4.333179 1.930819 2.081515  
C 3.901818 2.636118 -0.306322  
C 5.214676 3.163920 2.381390

|   |          |          |           |
|---|----------|----------|-----------|
| C | 4.033665 | 4.030489 | 0.339509  |
| C | 5.307802 | 4.121126 | 1.176375  |
| H | 5.593329 | 1.435783 | 0.416666  |
| H | 3.270512 | 2.165843 | 2.264635  |
| H | 4.611949 | 1.116019 | 2.768357  |
| H | 4.414724 | 2.631019 | -1.282357 |
| H | 2.836454 | 2.427228 | -0.496134 |
| H | 4.788186 | 3.694128 | 3.252148  |
| H | 6.227413 | 2.832373 | 2.676124  |
| H | 4.018437 | 4.799744 | -0.452101 |
| H | 3.156122 | 4.226917 | 0.981397  |
| H | 6.173563 | 3.850545 | 0.541871  |
| H | 5.489043 | 5.153882 | 1.522872  |

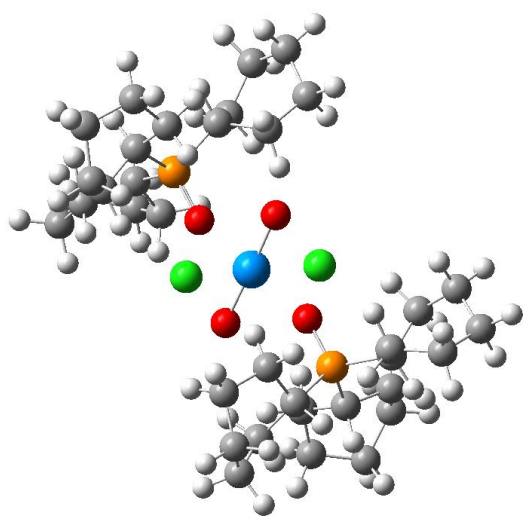

### Uranyl 3

U -0.043676 0.058210 0.045955  
O -0.272906 -0.015457 -1.748766  
Cl 0.075835 2.720374 -0.139322  
O 0.226368 0.201412 1.824134  
Cl -0.084506 -2.602180 0.242197  
O -2.420458 0.037399 0.375305  
P -3.868803 0.112272 -0.127357  
C -4.199022 1.735198 -0.944434  
C -3.576627 1.822105 -2.351049  
C -3.692142 2.922758 -0.074286  
C -4.068815 3.089153 -3.078649  
C -3.302919 4.140830 -0.929606  
C -4.248118 4.282101 -2.118961  
H -5.301011 1.786400 -1.048035  
H -2.481199 1.842058 -2.245696  
H -3.820226 0.943658 -2.962806  
H -4.483394 3.216147 0.628686  
H -2.815377 2.614508 0.514189  
H -3.335386 3.342459 -3.859937  
H -5.019236 2.876778 -3.594071  
H -3.319465 5.040204 -0.296680  
H -2.265859 4.027919 -1.282327  
H -5.287480 4.316710 -1.747900  
H -4.079471 5.228979 -2.652973  
C -4.299807 -1.208562 -1.370904  
C -5.043895 -2.457141 -0.862802  
C -3.047821 -1.675372 -2.152543  
C -5.665391 -3.202322 -2.063977  
C -3.318691 -2.979039 -2.935773  
C -4.789207 -3.098936 -3.327620  
H -4.990224 -0.678542 -2.056251  
H -4.322083 -3.111559 -0.350202  
H -5.836145 -2.224677 -0.139344  
H -2.707639 -0.885238 -2.833801  
H -2.222068 -1.853160 -1.450510  
H -5.802535 -4.259286 -1.785947  
H -6.669244 -2.797855 -2.270789  
H -2.667793 -3.010930 -3.820933  
H -3.039331 -3.847820 -2.317806  
H -5.078282 -2.213081 -3.918511  
H -4.958287 -3.969656 -3.978574  
C -5.040155 -0.110196 1.281587  
C -5.329798 1.141037 2.141385  
C -4.562281 -1.244169 2.208959  
C -5.964205 0.751976 3.500188  
C -5.734836 -1.721712 3.089339  
C -6.714491 -0.575993 3.410698  
H -5.986565 -0.419445 0.800906

|   |           |           |           |
|---|-----------|-----------|-----------|
| H | -4.402248 | 1.698840  | 2.328636  |
| H | -6.011316 | 1.809299  | 1.593306  |
| H | -4.126499 | -2.089133 | 1.662012  |
| H | -3.747490 | -0.841197 | 2.828825  |
| H | -5.176350 | 0.661247  | 4.265137  |
| H | -6.631259 | 1.559082  | 3.836987  |
| H | -6.273792 | -2.540722 | 2.586924  |
| H | -5.328388 | -2.141389 | 4.022950  |
| H | -7.487015 | -0.502869 | 2.625848  |
| H | -7.252560 | -0.785193 | 4.347340  |
| N | 2.323678  | -0.078984 | -0.489605 |
| P | 3.845344  | -0.127941 | 0.065083  |
| H | 2.305978  | 0.126353  | -1.496660 |
| C | 3.994393  | -1.254793 | 1.514427  |
| C | 3.974061  | -2.755926 | 1.124609  |
| C | 2.947972  | -1.036983 | 2.620152  |
| C | 3.680750  | -3.650489 | 2.350922  |
| C | 3.444251  | -1.697506 | 3.918831  |
| C | 4.201224  | -3.013450 | 3.636937  |
| H | 4.995331  | -1.004837 | 1.919345  |
| H | 3.194590  | -2.930338 | 0.369271  |
| H | 4.945591  | -3.036656 | 0.689782  |
| H | 2.705919  | 0.015695  | 2.796535  |
| H | 2.009295  | -1.503915 | 2.293374  |
| H | 2.593898  | -3.807465 | 2.436755  |
| H | 4.127825  | -4.643057 | 2.190178  |
| H | 4.096678  | -1.003137 | 4.473113  |
| H | 2.572561  | -1.892795 | 4.562035  |
| H | 5.282233  | -2.816593 | 3.530135  |
| H | 4.099583  | -3.703327 | 4.488027  |
| C | 5.039183  | -0.786558 | -1.219256 |
| C | 5.621695  | 0.269862  | -2.174254 |
| C | 4.419108  | -1.952134 | -2.043763 |
| C | 6.791268  | -0.324858 | -2.984512 |
| C | 5.051942  | -2.080816 | -3.439937 |
| C | 6.549616  | -1.798203 | -3.372427 |
| H | 5.879951  | -1.175105 | -0.612293 |
| H | 4.829955  | 0.617607  | -2.857239 |
| H | 5.983673  | 1.155316  | -1.636323 |
| H | 4.568404  | -2.894096 | -1.500417 |
| H | 3.330626  | -1.820463 | -2.136048 |
| H | 6.932441  | 0.286112  | -3.889777 |
| H | 7.721789  | -0.239728 | -2.401191 |
| H | 4.854499  | -3.089962 | -3.830759 |
| H | 4.579142  | -1.378136 | -4.145839 |
| H | 7.001058  | -2.467512 | -2.620166 |
| H | 7.045024  | -2.027808 | -4.327178 |
| C | 4.544203  | 1.530257  | 0.574277  |
| C | 4.360853  | 1.926954  | 2.049347  |
| C | 3.969481  | 2.648872  | -0.332528 |

|   |          |          |           |
|---|----------|----------|-----------|
| C | 5.243189 | 3.153278 | 2.369908  |
| C | 4.100559 | 4.041390 | 0.314574  |
| C | 5.358238 | 4.123285 | 1.179512  |
| H | 5.633139 | 1.425036 | 0.403189  |
| H | 3.300983 | 2.167609 | 2.222867  |
| H | 4.624699 | 1.111273 | 2.734110  |
| H | 4.489071 | 2.644008 | -1.302418 |
| H | 2.904061 | 2.450742 | -0.530352 |
| H | 4.809734 | 3.673848 | 3.238817  |
| H | 6.247269 | 2.815789 | 2.675342  |
| H | 4.107910 | 4.808876 | -0.471762 |
| H | 3.214501 | 4.244592 | 0.936799  |
| H | 6.234420 | 3.863781 | 0.560556  |
| H | 5.528448 | 5.148868 | 1.538530  |

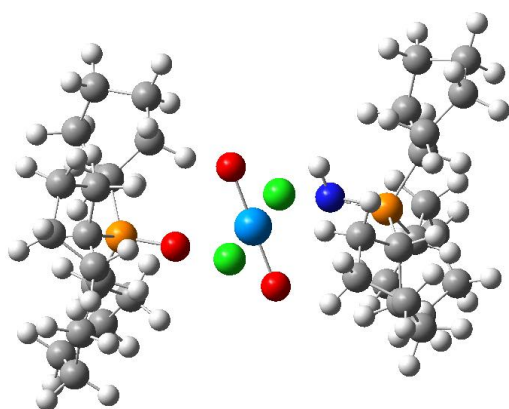

Supplement: c3dt51337h.pdf [file c3dt51337h.pdf]
